# 1 Cold stress induces a rapid 2 redistribution of the antagonistic 3 marks H3K4me3 and H3K27me3 in 4 *Arabidopsis thaliana*

5 Léa Faivre<sup>1\*</sup>, Nathalie-Francesca Kinscher<sup>1</sup>, Ana Belén Kuhlmann<sup>1</sup>, Xiaocai Xu<sup>2</sup>, Kerstin  
6 Kaufmann<sup>2</sup>, Daniel Schubert<sup>1</sup>

7 <sup>1</sup>Epigenetics of Plants, Freie Universität Berlin, Berlin, Germany

8 <sup>2</sup>Department for Plant Cell and Molecular Biology, Institute for Biology, Humboldt-Universität zu  
9 Berlin, Berlin, Germany.

## 10 Abstract

11 When exposed to low temperatures, plants undergo a drastic reprogramming of their transcriptome  
12 in order to adapt to their new environmental conditions, which primes them for potential freezing  
13 temperatures. While the involvement of transcription factors in this process, termed cold  
14 acclimation, has been deeply investigated, the potential contribution of chromatin regulation  
15 remains largely unclear. A large proportion of cold-inducible genes carries the repressive mark  
16 histone 3 lysine 27 trimethylation (H3K27me3), which has been hypothesized as maintaining them  
17 in a silenced state in the absence of stress, but which would need to be removed or counteracted  
18 upon stress perception. However, the fate of H3K27me3 during cold exposure has not been studied  
19 genome-wide. In this study, we offer an epigenome profiling of H3K27me3 and its antagonistic  
20 active mark H3K4me3 during short-term cold exposure. Both chromatin marks undergo rapid  
21 redistribution upon cold exposure, however, the gene sets undergoing H3K4me3 or H3K27me3  
22 differential methylation are distinct, refuting the simplistic idea that gene activation relies on a  
23 switch from an H3K27me3 repressed chromatin to an active form enriched in H3K4me3. Coupling  
24 the ChIP-seq experiments with transcriptome profiling reveals that differential histone methylation  
25 correlates with changes in expression. Interestingly, only a subset of cold-regulated genes lose  
26 H3K27me3 during their induction, indicating that H3K27me3 is not an obstacle to transcriptional  
27 activation. In the H3K27me3 methyltransferase *curly leaf (clf)* mutant, many cold regulated genes  
28 display reduced H3K27me3 levels but their transcriptional activity is not altered prior or during a  
29 cold exposure, suggesting that H3K27me3 may serve a more intricate role in the cold response than  
30 simply repressing the cold-inducible genes in naïve conditions.

## 31 Abbreviations:

32 COR: Cold Responsive, DE: Differentially Expressed, DM: Differentially Methylated, GO: Gene  
33 Ontology, H3K4me3: Histone 3 Lysine 4 trimethylation, H3K27me3: Histone 3 Lysine 27  
34 trimethylation, TES: Transcription End Site, TSS: Transcription Start Site

## 35 1 INTRODUCTION

36 Low temperatures negatively affect both plant growth and productivity. Low temperature stress  
37 can be divided into chilling stress (0-15°C for temperate plants such as *Arabidopsis thaliana*) and  
38 freezing stress (subzero temperatures) and plants devised strategies to cope with both of these stress  
39 types (Zarka *et al.*, 2003). While plants have a constitutive tolerance towards chilling stress, the  
40 freezing tolerance of most plants growing in a temperate climate is increased during an exposure  
41 to low but non-freezing temperatures, a process known as cold acclimation (Gilmour, Hajela and  
42 Thomashow, 1988; Jan, Andrabi and others, 2009). Cold acclimation relies on the production of a  
43 variety of proteins whose function is to limit the damage caused by a putative future freezing event  
44 and is therefore associated with a significant transcriptional reprogramming (Calixto *et al.*, 2018;  
45 Shi, Ding and Yang, 2018). Upon perception of low temperature, the ICE1 transcription factor is  
46 activated, thereby inducing the expression of the C-repeat Binding Factors (CBFs) (Wang *et al.*,  
47 2017). In turn, the CBFs bind to the C-Repeat motifs of cold-responsive (*COR*) genes (Yamaguchi-  
48 Shinozaki and Shinozaki, 1994; Medina *et al.*, 1999). This results in the transcriptional activation  
49 of thousands of *COR* genes within a few hours of exposure to low temperatures. While numerous  
50 transcription regulators have been identified as playing a role in cold acclimation, the putative  
51 contribution of the chromatin status to this transcriptional reprogramming remains  
52 underinvestigated.

53 Chromatin is an important contributor to the regulation of transcription, as it controls the  
54 accessibility of the underlying DNA to the transcriptional machinery. Within the nucleus, DNA is  
55 wrapped around octamers of histones, forming the nucleosome, which is the basic organizational  
56 unit of the chromatin (Kornberg, 1977; Luger *et al.*, 1997). Histones tails protrude from the  
57 nucleosome and can be heavily post-translationally modified by acetylation, methylation and  
58 phosphorylation, among others (Luger and Richmond, 1998; Zhao and Garcia, 2015). Those  
59 histone post-translational marks (PTMs) can affect the transcriptional activity of the underlying  
60 gene directly, by modulating the strength of the interaction between DNA and histones, or  
61 indirectly, by recruiting other proteins called histone readers that recognize and bind to specific  
62 histone PTMs (Blakey and Litt, 2015). Depending on whether they are associated with transcribed  
63 or silenced genes, histone PTMs are classified as active or repressive marks, respectively. Some of  
64 the most characterized histone PTMs are the trimethylation on lysine 4 (H3K4me3) and 27  
65 (H3K27me3) of histone 3, which respectively act as an active and a repressive mark (Roudier *et al.*,  
66 2011; Cheng *et al.*, 2020). H3K27me3 is deposited by the Polycomb Repressive Complex 2  
67 (PRC2) and contributes to the silencing of its targets (Müller *et al.*, 2002; Zhang *et al.*, 2007).  
68 PRC2, which was initially identified in *Drosophila*, consists of four subunits, including the  
69 Enhancer of zeste (E(z)) methyltransferase (Müller *et al.*, 2002). Three homologs of E(z) have been  
70 identified in *Arabidopsis thaliana*: CURLY LEAF (CLF), SWINGER (SWN) and MEDEA (MEA)  
71 (Chanvivatana *et al.*, 2004). The action of PRC2 is counteracted by methyltransferases from the  
72 Trithorax (TrxG) group, which deposit H3K4me3 (Ingham, 1983; Ringrose and Paro, 2004).  
73 H3K27me3 and H3K4me3 have long been described as being mutually exclusive, with genes  
74 undergoing a Polycomb (PcG)/TrxG switch during their transcriptional activation, where  
75 H3K27me3 is removed and replaced by H3K4me3 (Ringrose and Paro, 2004; Köhler and Hennig,  
76 2010; Kuroda *et al.*, 2020).

77 In plants, both H3K4me3 and H3K27me3 have been implicated in the control of development, but  
78 also of stress responses (Köhler and Hennig, 2010; Kleinmanns and Schubert, 2014; Engelhorn *et al.*,  
79 2017; Faivre and Schubert, 2023). Indeed, several PcG proteins are necessary for the repression

80 of stress responses in plants growing in optimal conditions (Alexandre *et al.*, 2009; Kim, Zhu and  
81 Renee Sung, 2010; Kleinmanns *et al.*, 2017) while numerous TrxG members have been shown to  
82 be essential to the proper induction of stress responses (Ding, Avramova and Fromm, 2011; Song  
83 *et al.*, 2021). In addition to the immediate control of stress responses, both H3K4me3 and  
84 H3K27me3 also regulate the memory of past stress episodes (Friedrich *et al.*, 2018; Yamaguchi *et al.*,  
85 2021). However, the potential role of both methylation marks in the response to cold and in  
86 cold acclimation remains largely underinvestigated. Numerous *COR* genes carry H3K27me3 in the  
87 absence of cold (Vyse *et al.*, 2020) and the repressive mark is lost on certain loci during cold  
88 exposure (Kwon *et al.*, 2009). H3K27me3 has therefore been hypothesized to maintain the *COR*  
89 genes in a silenced state until the plant perceives low temperatures, at which point the repression  
90 is lifted through demethylation. However, previous work from our lab demonstrated that not all  
91 H3K27me3-carrying *COR* genes undergo demethylation during cold exposure (Vyse *et al.*, 2020),  
92 raising questions on both the role of H3K27me3 and its removal in the control of cold responses.  
93 In order to shed more light on the putative contribution of H3K27me3 to cold acclimation, we  
94 performed a genome-wide profiling of its distribution during cold exposure. As stress-responsive  
95 genes are commonly thought to be undergoing a PcG/TrxG switch during their activation, the  
96 distribution of H3K4me3 was also examined. We uncovered a rapid redistribution of both  
97 methylation marks upon cold exposure, albeit on distinct sets of genes. By combining the  
98 epigenomic approach with a transcriptomic study, we identified a correlation between differential  
99 methylation and differential expression. However, differential methylation was not required for the  
100 transcriptional activation of *COR* genes, but might favor a higher amplitude of induction. Finally,  
101 we examined the impact of reduced H3K27me3 levels in the *clf* mutant on the cold acclimation  
102 response and could not detect any significant difference in physiological or transcriptional  
103 responses, suggesting that H3K27me3 might not participate directly in the cold response but rather  
104 in more long-term responses or to the deacclimation process. Alternatively, H3K27me3 levels may  
105 only be sufficiently reduced in *clf swn* double mutants for unmasking the role of H3K27me3 in  
106 cold acclimation.

## 107 **2 MATERIAL AND METHODS**

### 108 **2.1 PLANT MATERIAL AND GROWTH CONDITIONS**

109 *Arabidopsis thaliana* accession Columbia (Col0) was used as a wild type. The *clf-28* line  
110 (SALK\_139371) was obtained from the Nottingham Arabidopsis Stock Centre (NASC). The  
111 primers used for genotyping are listed in Supplementary Information Table S1. The seeds were  
112 surface-sterilized, stratified in the dark at 4 °C for three days and grown on ½ MS media  
113 supplemented with Gamborg B5 vitamins (Duchefa) containing 1.5% (w/v) plant agar (Duchefa)  
114 in short day conditions (8 h light, 16 h darkness) at 20 °C for 21 days. Cold treatments were  
115 performed at 4 °C in short day conditions for 3 hours or 3 days.

### 116 **2.2 ELECTROLYTE LEAKAGE**

117 Plants were grown as described previously for 21 days and placed at 4°C for three days. The  
118 freezing tolerance was then measured by electrolyte leakage assay using a protocol adapted from  
119 Hinch and Zuther (2014). Four technical replicates were performed for each biological replicate.  
120 For each sample, six temperature points were measured, using a pool of shoot tissue of five to eight  
121 seedlings. The LT50 was determined using the non-linear regression log(agonist) vs response from  
122 the GraphPad Prism version 7.0 (GraphPad Software).

## 123            **2.3 WESTERN BLOT**

124    100 mg of 21 day-old seedlings were harvested 4 hours after the light onset and flash-frozen in  
125    liquid nitrogen. The histones were extracted following the protocol described in Bowler *et al.*  
126    (2004) with the following modifications: the samples were resuspended in 1 mL of buffer 1. After  
127    filtration through Miracloth, the samples were centrifuged 20 min at 4000 rpm at 4 °C. The pellets  
128    were resuspended in 300 µL of buffer 2, centrifuged 10 min at 13000 rpm at 4°C and resuspended  
129    in 300 µL of buffer 3 and layered on 300 µL of clean buffer 3. After a 1 h centrifugation at 13000  
130    rpm at 4°C, the pellets were resuspended in 100 µL of nuclei lysis buffer. The protein concentration  
131    was assessed using the Qubit protein assay (ThermoFisher Scientific) and all samples were adjusted  
132    to the same concentration using nuclear lysis buffer. The immunoblot analysis was performed as  
133    described in Hisanaga *et al.* (2023) using the following antibodies: α-H3K27me3 (C15410195  
134    Diagenode), α-H3K4me3 (C15410003, Diagenode) and α-H3pan (C15200011 Diagenode). The  
135    imaging was performed using the Image Studio Lite software (Li-Cor, version 5.2). The intensity  
136    of the H3K27me3 and H3K4me3 signals were normalized to the intensity of the H3 signal.

## 137            **2.4 CHIP-qPCR**

138    1 g of 21 day-old seedlings was harvested 4 hours after the light onset. The cross-linking reaction,  
139    chromatin extraction and immunoprecipitation were performed as previously described in Vyse *et al.*  
140    (2020). The chromatin was incubated with 1 µg of α-H3K27me3 (C15410195 Diagenode), α-  
141    H3K4me3 (C15410003, Diagenode), α-H3pan (C15200011 Diagenode) or α-IgG (C15410206  
142    Diagenode) antibodies. The qPCR was performed using the Takyon ROX SYBR MasterMix blue  
143    dTTP kit and the QuantStudio5 (Applied Biosystems). The primers used for the CHIP-qPCR  
144    analysis are listed in Supplementary Information Table S1.

## 145            **2.5 CHIP-SEQ ANALYSIS**

146    After DNA recovery, the DNA was purified and concentrated using the ChIP DNA Clean and  
147    Concentrator kit (Zymo Research). The libraries were prepared using the ThruPLEX DNA-seq kit  
148    (Takara Bio) and indexes from the SMARTer DNA HT Dual Index kit (Takara Bio). DNA  
149    fragments were then selected based on size using AMPure beds (Beckman Coulter). The  
150    concentration of the samples was measured using the Qubit dsDNA High Sensitivity kit and the  
151    Qubit Fluorometer (ThermoFisher Scientific) and the library quality was assessed using the High  
152    Sensitivity DNA ScreenTape and the TapeStation (Agilent). The libraries were sequenced by  
153    Novogene (UK) using a HiSeq instrument (Illumina) in 150bp paired-end mode. Two biological  
154    replicates were performed, a summary of the reads number is given in Supplementary Information  
155    Table S2.

156    Bioinformatic analyses were performed using Curta, the High Performance Computing of the Freie  
157    Universitaet Berlin (Bennet, Melchers and Proppe, 2020). The reads were mapped to the TAIR10  
158    reference genome of *Arabidopsis thaliana* using Bowtie2 (Langmead and Salzberg, 2012). PCR  
159    duplicates and reads with an alignment quality MAPQ < 10 were removed using samtools rmdup  
160    and samtools view respectively (Li *et al.*, 2009). The peak calling was performed using MACS2,  
161    using the broad option and a p-value threshold of 0.01 (Gaspar, 2018). Bigwig tracks were  
162    generated by pooling the two replicates and normalizing as RPKM using DeepTools bamCoverage,  
163    using a bin size of 10bp (Ramírez *et al.*, 2016) and visualized using the IGV genome browser  
164    (Robinson *et al.*, 2011).

165 Read counts for each nuclear-encoded gene (from TSS to TES) were obtained using featureCounts  
166 (Liao, Smyth and Shi, 2014) and fold changes were computed using DESeq2 (Love, Huber and  
167 Anders, 2014). A gene was considered differentially methylated if (i) it was located within a peak  
168 of the histone mark in at least one of the tested condition and (ii) it showed an absolute log<sub>2</sub> fold  
169 change of at least 0.5. The metagenes plots were produced using deepTools (Ramírez *et al.*, 2016)  
170 on the merged RPKM bigwig files, scaling all genes to 2000 bp and examining a region starting  
171 500 bp upstream from the TSS and ending 500 bp downstream from the TES.

## 172 **2.6 RT-qPCR**

173 100 mg of seedlings were harvested 4 hours after light onset and flash frozen in liquid nitrogen.  
174 After grinding to a fine powder, total RNA was extracted using the innuPREP Plant RNA kit  
175 (Analytik Jena). Samples were treated with DNaseI (ThermoFisher Scientific) and cDNA was  
176 synthesized using the RevertAid Reverse Transcriptase kit (ThermoFisher Scientific). The qPCR  
177 was performed using the Takyon ROX SYBR MasterMix blue dTTP kit and the QuantStudio5  
178 (Applied Biosystems). The primers used for the RT-qPCR analysis are listed in Supplementary  
179 Information Table S1. The Ct values were normalized by subtracting the mean of three  
180 housekeeping genes (*ACTIN2*, *PDF* and *TIP41*) from the Ct value of each gene of interest ( $\Delta Ct$ ).  
181 Transcript abundance was expressed as  $2^{-\Delta Ct}$ .

## 182 **2.7 RNA-SEQ ANALYSIS**

183 RNA samples were extracted and DNaseI-treated as previously described. The libraries were  
184 prepared using poly-A enrichment by Novogene (UK) and the sequencing was performed on the  
185 NovaSeq 600 platform (Illumina) in 150bp paired-end mode. Three biological replicates were  
186 analysed and a summary of the reads number is given in Supplementary Information Table S2.

187 Bioinformatic analyses were performed using Curta, the High Performance Computing of the Freie  
188 Universitaet Berlin (Bennet, Melchers and Proppe, 2020). The reads were mapped to the reference  
189 genome of *Arabidopsis thaliana* (TAIR10) using STAR (Dobin *et al.*, 2013), using a minimum and  
190 maximum intron size of 60 and 6000 bases respectively. The counting was performed using  
191 featureCounts (Liao, Smyth and Shi, 2014), using only reads with an alignment score superior to  
192 10. The differential expression analysis was performed using the DESeq2 package (Love, Huber  
193 and Anders, 2014). A gene was considered to be differentially expressed (DEG) if it presented an  
194 absolute log<sub>2</sub> fold change of at least 1 and a Benjamini-Hochberg adjusted p-value inferior to 0.05.  
195 As the differences in expression were correlated to the differences in histone methylation levels,  
196 only nuclear-encoded DEGs were retained in the analysis.

## 197 **2.8 STATISTICS AND DATA VISUALIZATION**

198 Unless stated otherwise, statistical analyses and plots were generated using R or GraphPad Prism  
199 (GraphPad Software). Normal distribution was tested using the Shapiro-Wilks' method. For  
200 normally distributed data, ANOVA tests and any post-hoc tests were performed using the agricolae  
201 package (de Mendiburu and Yaseen, 2020).

202 Gene ontology enrichment analyses were performed in RStudio using the topGO package (Alexa  
203 and Rahnenfuhrer, 2021), the TAIR10 annotation and the gene-GO term relationships from the  
204 org.At.tair.db package, version 3.17.0 (Carlson, 2019).



## 205 3 RESULTS

### 206 3.1 H3K4ME3 AND H3K27ME3 UNDERGO DIFFERENTIAL METHYLATION UPON 207 SHORT COLD EXPOSURE

208 To determine whether cold exposure triggers genome-wide changes in the levels of H3K27me3  
209 and H3K4me3, a Western-Blot was conducted on plants exposed to 4°C for three hours or three  
210 days (Figure 1A and B). For both chromatin marks, no genome wide changes could be detected at  
211 the time points tested here. However, previous studies indicated that H3K27me3 is removed from  
212 certain loci upon cold exposure while H3K4me3 was shown to be accumulated at others,  
213 suggesting that both marks might undergo differential methylation in a loci-specific manner that  
214 does not lead to changes detectable at the genome wide scale (Kwon *et al.*, 2009; Miura, Renhu  
215 and Suzaki, 2020; Vyse *et al.*, 2020). To assess this possibility, an epigenome profiling of the  
216 distribution of H3K4me3 and H3K27me3 was performed at the same time points described above.  
217 In total, 13829, 14152 and 14430 H3K4me3 peaks were detected in naïve, 3h and 3d samples  
218 respectively while 5753, 5665 and 5802 H3K27me3 peaks were detected in those same samples.  
219 These peaks largely overlapped for the individual marks, indicating that short cold exposure did  
220 not lead to a substantial redistribution of the chromatin methylation marks investigated here. In  
221 order to detect lower magnitudes of methylation levels changes, reads mapped between the  
222 transcription start site (TSS) and transcription end site (TES) of genes targeted by each methylation  
223 mark were counted and normalized for each condition (Figure 1C to F). The correlation plots  
224 indicated that H3K4me3 is accumulated after three hours of cold exposure while after three days,  
225 this tendency mostly disappeared (Figure 1C and E). On the other hand, H3K27me3 correlation  
226 plots displayed an accumulation of the mark at both time points (Figure 1D and F). The  
227 differentially methylated genes were identified as genes targeted by the respective mark (i.e.  
228 covered by a peak in a least one condition) and showing an absolute log<sub>2</sub>FC of the normalized  
229 counts of at least 0.5. The complete list of differentially methylated (DM) genes can be found in  
230 Supplementary Table 3. Consistent with the general trend observed on the correlation plots, more  
231 genes were found to significantly gain H3K4me3 or H3K27me3 than losing it. 3619 and 2309 DM  
232 genes were identified for H3K4me3 after three hours and three days of cold treatment, respectively,  
233 while H3K27me3 differential methylation was detected only on 735 and 922 genes, respectively.  
234 This substantial disparity in the number of DM genes between H3K4me3 and H3K27me3 can be  
235 largely explained by the fact that H3K4me3 targets a broader proportion of genes than H3K27me3  
236 (17366 vs 8128): between 13 and 20% of H3K4me3 targets are differentially methylated while  
237 only 9 to 11% of H3K37me3 targets undergo changes during cold exposure.

238 While the proportion of DM genes is not strikingly different between H3K4me3 and H3K27me3,  
239 the magnitude of the changes differs significantly, with H3K4me3 DM genes presenting higher  
240 absolute fold change values than H3K27me3 DM genes (Figure 1C to F, Supplementary Figure 1).  
241 These observations were confirmed when examining the levels of both methylation marks at  
242 specific loci (Figure 2A): the changes of H3K4me3 were drastic, leading to peaks appearing  
243 (*CBF3*, *LTI30* and *COR15A*) or disappearing (*HSP90.1*). The changes were prominently located  
244 just downstream of the TSS, consistent with the known localization of H3K4me3, whose peaks  
245 usually center around the TSS of its target genes, and were more pronounced after three days than  
246 after three hours (Supplementary Figure 1A). On the other hand, while H3K27me3 loss led to the  
247 almost-complete loss of peaks at certain loci such as *LTI30*, it was more limited on other such as  
248 *COR15A*, where the H3K27me3 peaks were still visible after three days of cold treatment. Genes

249 gaining H3K27me3 showed moderately increased levels of the repressive mark on the sides of the  
 250 original peak (*END1* and *AT5G43570*). The variations in H3K27me3 occurred on the whole gene  
 251 body of the DM genes and were more pronounced in the case of loss than of gain (Supplementary  
 252 Figure 1B). Overall, even short cold exposure times of three hours were sufficient to trigger  
 253 significant alteration of the level of both methylation marks on thousands of loci.

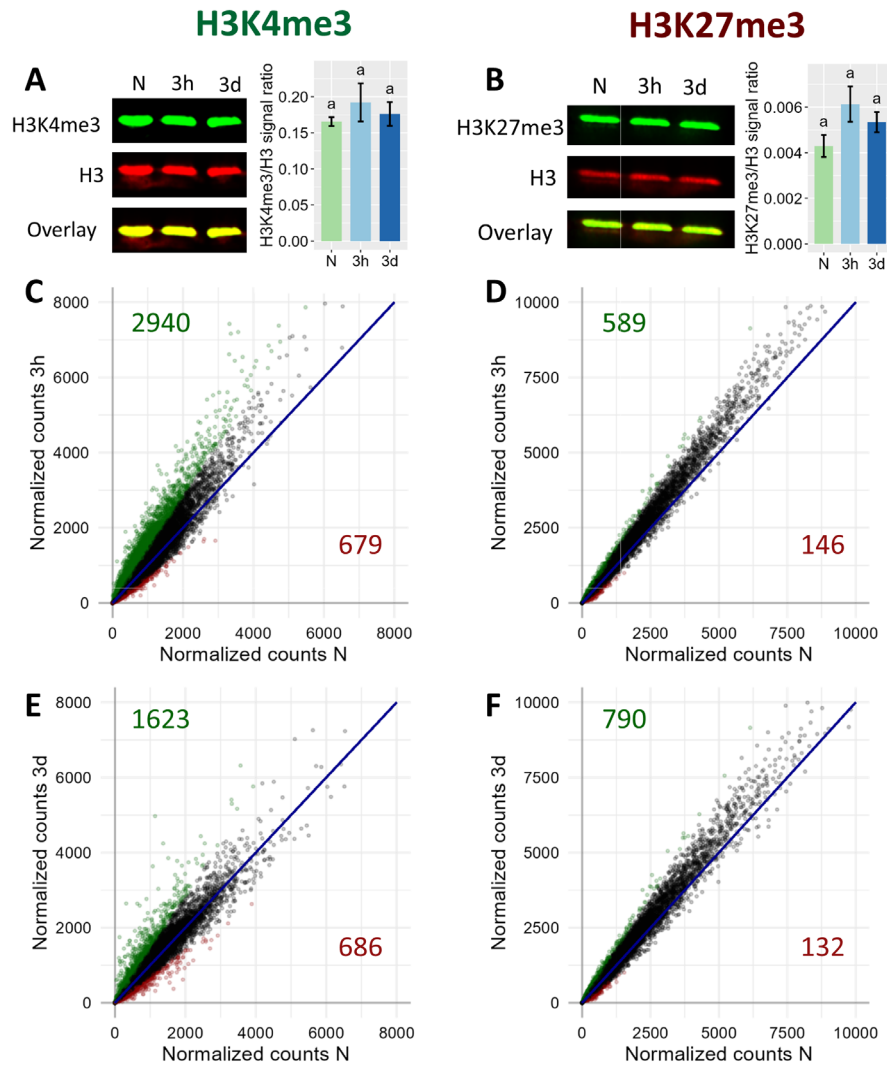

254

255 **Figure 1: Genome-wide dynamics of H3K4me3 (left) and H3K27me3 (right) upon cold exposure.** Plants  
 256 were grown for 21 days at 20°C (N) and then exposed to 4°C for three hours (3h) or three days (3d). (A)  
 257 and (B) Global levels of H3K4me3 and H3K27me3, respectively, as measured by Western Blot. The  
 258 membrane images show the signal of the histone methylation mark in green, of total histone 3 in red and  
 259 the overlay of both signals in yellow. The bar charts on the right of the membrane images display the  
 260 modification/H3 signal ratio of four independent biological replicates. Significance was tested by one-way  
 261 ANOVA followed by a Tukey post-hoc test ( $\alpha = 0.05$ ). Identical letters indicate no significant difference. (C)  
 262 to (F) Correlation plot of H3K4me3 ((C) and (E)) and H3K27me3 ((D) and (F)) levels on genes targeted  
 263 by the respective mark after 3h ((C) and (D)) or 3d ((E) and (F)) of cold exposure. Each point represents a  
 264 gene targeted by the respective mark. Reads were counted over the gene body and were normalized to  
 265 library size using DESeq2 (See Material and Methods). Genes showing a log<sub>2</sub> fold change of the respective  
 266 mark smaller than -0.5 are displayed in red, while genes showing log<sub>2</sub> fold change of at least 0.5 are

267 displayed in green. Total number of genes satisfying these criteria are indicated in red in the lower right  
 268 quadrant and green in the upper left quadrant respectively.

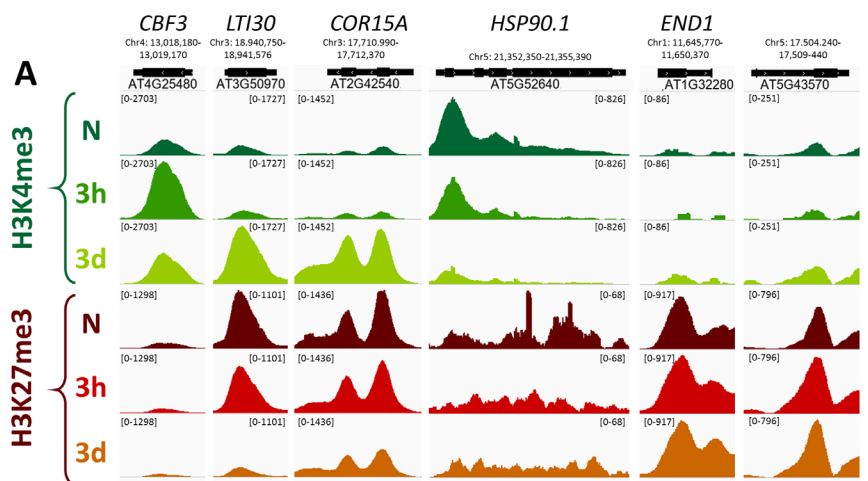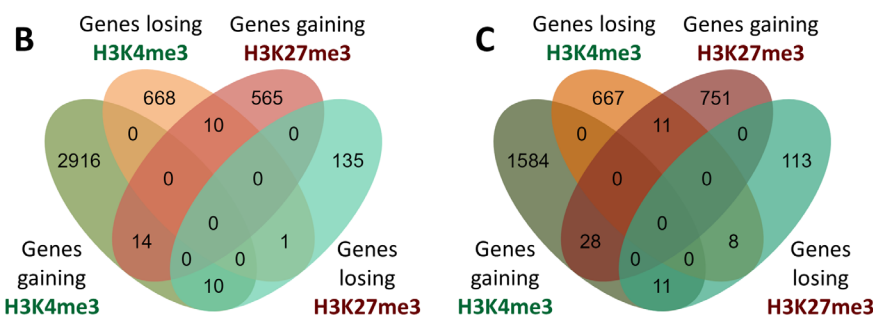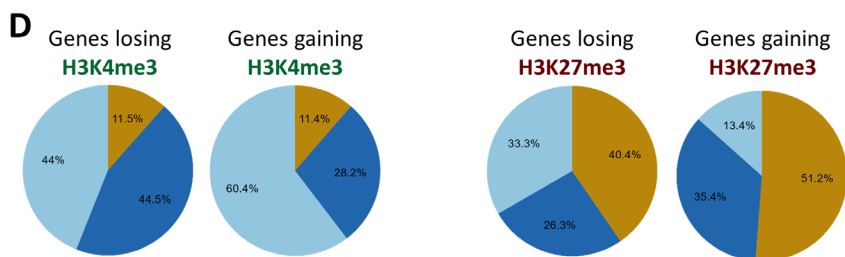

269

270 **Figure 2: Characterization of differentially methylated genes.** A differentially methylated gene is defined  
 271 as a gene targeted by H3K4me3 or H3K27me3, respectively, and showing an absolute log<sub>2</sub> fold change of  
 272 the respective methylation level of at least 0.5. (A) Genome browser views of H3K4me3 and H3K27me3  
 273 ChIP-seq signals at selected differentially methylated genes, in naïve plants (N) or plants exposed to 4°C  
 274 for 3h or 3d. The numbers in bracket at the top of each track indicate the scale of that track in reads per  
 275 million per bin. (B) and (C) Venn diagrams showing the overlaps of differentially methylated genes for both  
 276 histone methylation marks after 3h or 3d in the cold respectively. (D) Pie charts indicating the percentage  
 277 of differentially methylated genes being specifically regulated at a single time point or at both time points  
 278 examined, for each histone mark and direction of differential methylation.

## 279 3.2 H3K4ME3 AND H3K27ME3 DIFFERENTIAL METHYLATION OCCURS ON 280 STRESS RESPONSIVE AND DEVELOPMENTAL GENES, RESPECTIVELY



281 Overlapping the sets of DM genes at each time point revealed that only a minor proportion of them  
282 undergo a change in both H3K4me3 and H3K27me3 levels, totaling 35 genes at the 3h time point  
283 and 58 at the 3d time point (Figure 2B and C). As those marks are commonly described as  
284 antagonists, genes differentially methylated for both marks would be expected to display opposite  
285 changes. However, there are only slightly fewer genes showing same direction changes than  
286 opposite (10 vs 25 at 3h, 22 vs 36 at 3d), suggesting that the loss of one mark does not entail a gain  
287 of the other and vice versa. As the DM gene sets of H3K4me3 and H3K27me3 displayed such a  
288 reduced overlap, we hypothesized that H3K4me3 and H3K27me3 differential methylation might  
289 serve distinct purposes. To explore this hypothesis, a gene ontology (GO) term analysis for  
290 biological function was performed on each DM gene set (Supplementary Figures 2 and 3,  
291 Supplementary Table 5). Genes gaining H3K4me3 during a cold treatment were enriched for terms  
292 related to the cold response, cold acclimation and freezing tolerance as well as terms linked to the  
293 response to other abiotic and biotic stresses (water deprivation, hypoxia, fungus) (Supplementary  
294 Figure 2A and C). After three hours of cold exposure, genes losing H3K4me3 were enriched for  
295 terms related to protein refolding and chromatid cohesion, while after three days the set showed an  
296 enrichment for development and photosynthesis related terms (Supplementary Figure 2B and D).  
297 Few terms were found to be enriched among the genes losing H3K27me3, which might be due to  
298 the smaller size of the sets (Supplementary Figure 2B and C). Some terms related to stress  
299 responses were identified (response to salicylic acid and to fungus) but surprisingly, no term  
300 associated to the cold response was found to be enriched. Genes gaining H3K27me3 upon cold  
301 exposure were mostly enriched for development related terms (Supplementary Figure 3A and C).  
302 H3K4me3 and H3K27me3 differential methylation therefore occur on different sets of genes, with  
303 H3K4me3 DM mostly targeting stress responsive genes and H3K27me3 DM developmental genes.  
304 This could suggest that differential histone methylation holds a distinct role in the cold response  
305 depending on the specific mark.

306 To determine whether the methylation changes triggered by cold exposure were stable over time  
307 or dynamic, their persistence was examined by computing the percentage of genes differentially  
308 methylated at both time points (Figure 2D). In the case of H3K4me3, only 11% of the DM genes  
309 were identified at both time points, indicating that the variations in the level of the active mark  
310 were rather transient. On the contrary, 40 to 50% of H3K27me3 DM genes displayed a change at  
311 both time points, revealing H3K27me3 changes to be more stable over time than those of  
312 H3K4me3. Taken together with the results of the GO analysis and the small overlap between the  
313 genes which are DM for H3K4me3 and H3K27me3, this suggests that H3K4me3 and H3K27me3  
314 differential methylation might serve distinct purposes.

### 315 **3.3 DIFFERENTIAL METHYLATION PARTIALLY CORRELATES WITH** 316 **DIFFERENTIAL EXPRESSION**

317 As H3K4me3 and H3K27me3 are commonly described as favoring and silencing transcription,  
318 respectively, we hypothesized that the changes in the levels of those two chromatin marks might  
319 associate with differences in the transcriptional activity of the underlying genes. A transcriptome  
320 analysis was therefore performed on the same seedlings used for the epigenome investigations,  
321 leading to the identification of the nuclear-encoded genes up- and down-regulated after three hours  
322 or three days of cold exposure (Supplementary Table 4). After three hours of cold treatment, no  
323 correlation between the changes in H3K4me3 levels and the changes in expression could be  
324 detected (Figure 3A), while a weak negative correlation was observed for H3K27me3 (Figure 3B).  
325 However, after three days, the changes in expression were positively and negatively correlated with

326 the variations in H3K4me3 and H3K27me3, respectively (Figure 3C and D), indicating that genes  
 327 up-regulated by a cold treatment were more likely to gain H3K4me3 and/or lose H3K27me3. Since  
 328 those correlations were seen after three days of cold exposure but not (or to a lesser extend) after  
 329 three hours, it is likely that the two phenomenon (differential expression and differential  
 330 methylation) occur at a different pace. Indeed, after three days at 4°C, the plants are accustomed to  
 331 the cold and cold acclimation can already be detected at a physiological level, while after only three  
 332 hours, the plant is only starting its acclimation process and not all responses are fully accomplished  
 333 yet (Calixto *et al.*, 2018; Zuther *et al.*, 2019). To try and decipher whether chromatin or expression  
 334 changes first, the correlations analyses were repeated across time points (Figure 3E). The early  
 335 methylation changes did not strongly correlate with the late expression changes. However, early  
 336 expression changes correlated positively and negatively with the variations in H3K4me3 and  
 337 H3K27me3 levels, respectively. Those results collectively suggest that the transcriptional activity  
 338 of a gene is modulated ahead of its chromatin methylation status, but more precise time-course  
 339 experiments would be required to fully confirm this observation.

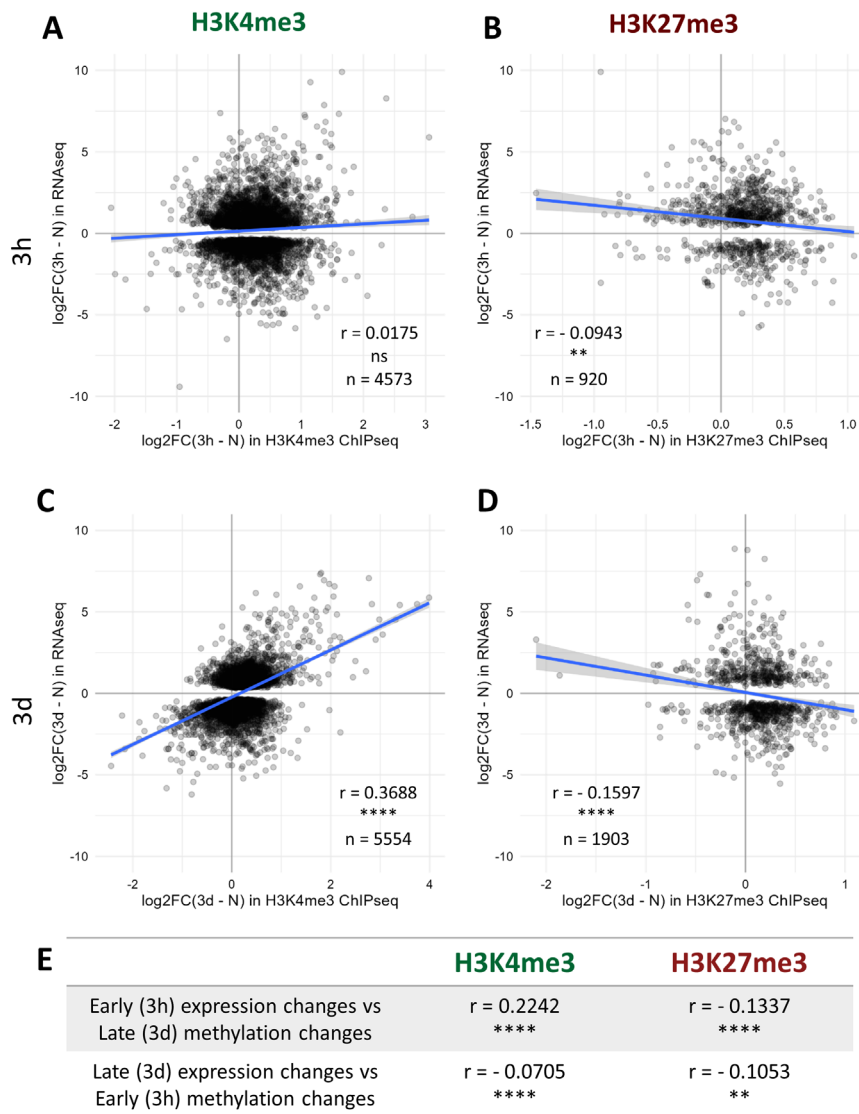

340

341 **Figure 3: Correlation between histone methylation and expression changes upon cold exposure.** Plants  
342 were grown for 21 days at 20°C (N) and then exposed to 4°C for three hours (3h) or three days (3d).  
343 H3K4me3 and H3K27me3 levels were measured by ChIP-seq while the changes in expression were detected  
344 by an RNA-seq conducted on RNA isolated from the same seedlings. Correlation between changes in  
345 expression and changes in H3K4me3 ((A) and (C)) or H3K27me3 ((B) and (D)) levels after 3h ((A) and  
346 (B)) or 3d ((C) and (D)) of cold exposure. For each graph, the X axis denotes the log<sub>2</sub> fold change in  
347 methylation signal over the whole gene body at the respective time point compared to non-cold treated  
348 plants while the Y axis shows the log<sub>2</sub> fold change in expression for the same comparison. Only genes which  
349 are differentially expressed at the considered time point, i.e. present an absolute log<sub>2</sub> fold change  $\geq 1$  and  
350 a  $p\text{-adj} < 0.05$ , and are targeted by the respective mark are shown on the scatterplot, their number is  
351 indicated as  $n$ . The correlation analyses were performed using the Spearman method, the correlation  
352 coefficient is indicated as  $r$ . ns indicates a non-significant correlation, \*\* denotes a  $p\text{-value} < 0.01$  and  
353 \*\*\*\* a  $p\text{-value} < 0.0001$ . (E) Table summarizing the correlation between changes in expression and in  
354 methylation levels across time points, performed as described above.

355 Although significant correlations between methylation and expression changes could be detected,  
356 their magnitude was relatively modest. The lists of significantly differentially expressed (DE) and  
357 DM genes exhibited a moderate overlap (Supplementary Figure 6), indicating that differential  
358 methylation is not required for differential expression and that differential expression does not  
359 necessarily result in differential methylation. Whether differential methylation contributes, even  
360 partially, to the transcriptome reprogramming remains unelucidated. In order to examine whether  
361 it might facilitate the induction of cold responsive genes, the transcriptional activity of non DM  
362 and DM genes was compared for each chromatin mark (Figures 4 and 5). Out of the 17366 genes  
363 detected as carrying H3K4me3 at any time point of the stress regimen, 1714 were up-regulated  
364 upon cold treatment (Figure 4A). The majority (57%) of these genes did not undergo differential  
365 methylation, as observed on the Venn diagrams (Supplementary Figure 6), while the levels of  
366 H3K4me3 increased on 37% of the genes and decreased for 6% of them, consistent with the  
367 correlation analyses (Figure 3). The genes undergoing differential methylation had slightly lower  
368 H3K4me3 levels than non-DM genes prior to cold exposure (Figure 4D). This was associated with  
369 a lower basal expression of genes losing H3K4me3, but no difference in expression in naïve  
370 conditions could be seen between non DM genes and genes gaining H3K4me3 upon cold exposure  
371 (Figure 4B). During a cold stress, the expression of genes gaining H3K4me3 increased significantly  
372 more than those of non DM and genes losing H3K4me3 and reached higher overall expression  
373 levels (Figure 4B and C). There was however no difference in the fold change of gene expression  
374 between non DM and genes losing H3K4me3. This suggests that H3K4me3 gain, while not strictly  
375 necessary for gene activation, might facilitate it, leading to a higher magnitude of induction.

376 8128 genes have been detected as carrying H3K27me3 in at least one time point during the stress  
377 regiment, of which 550 were induced by cold (Figure 5A). Only 3.6% of those genes lost  
378 H3K27me3 during cold exposure, confirming that H3K27me3 is not an obstacle to gene induction  
379 (Vyse *et al.*, 2020). Surprisingly, a higher proportion (7.6%) showed an increase in H3K27me3  
380 levels. Both genes gaining or losing H3K27me3 upon cold treatment had lower H3K27me3 levels  
381 in naïve conditions compared to non DM H3K27me3 targets (Figure 5D). However, this difference  
382 in the levels of the repressive mark was not associated with a difference in expression in naïve  
383 conditions (Figure 5B). The expression of non DM and DM genes remained similar upon cold  
384 exposure, but the genes losing H3K27me3 showed a higher fold change of expression after three  
385 days of cold treatment compared to genes which gained H3K27me3 (Figure 5B and C). This  
386 suggests that H3K27me3 loss might also contribute to the amplitude of induction.

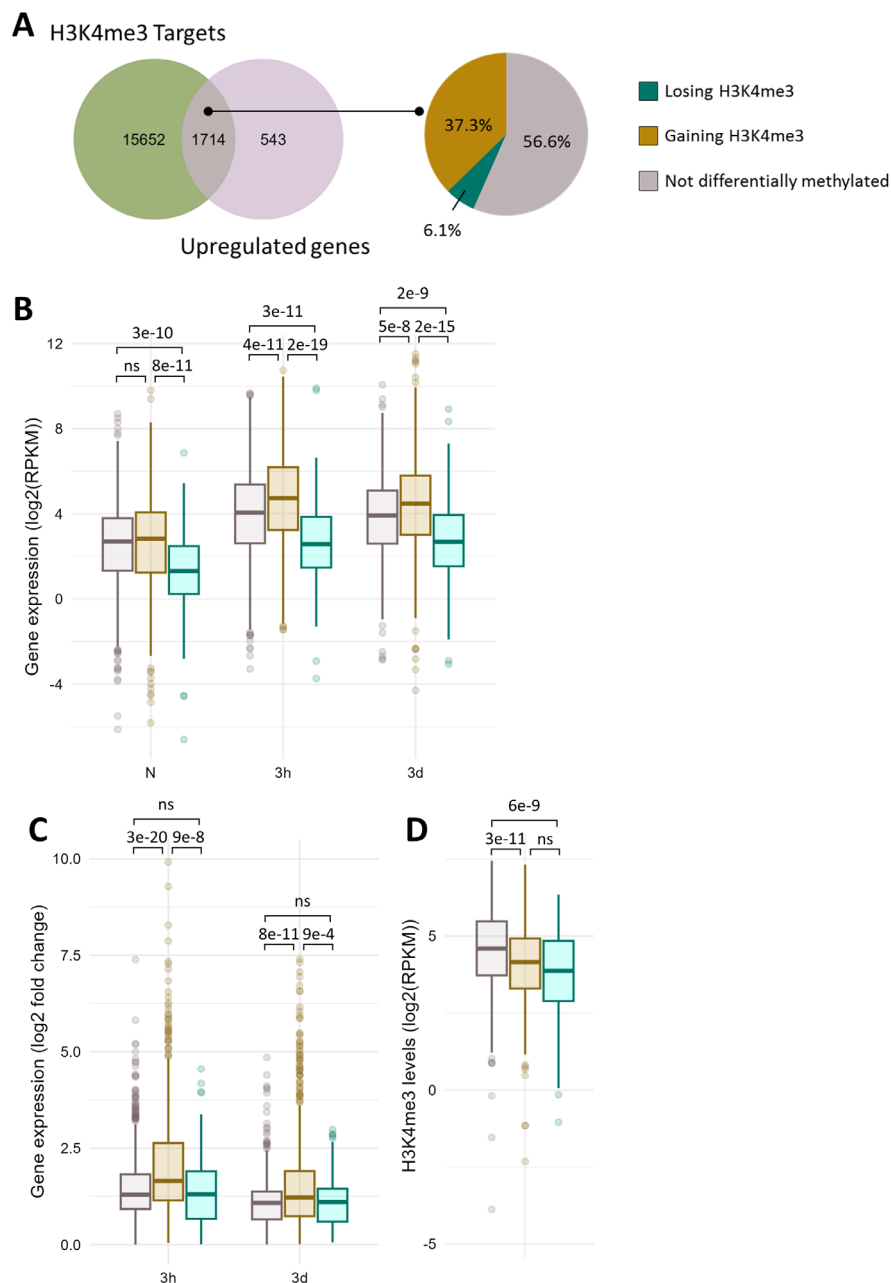

387

388 **Figure 4: A subset of cold induced genes gain H3K4me3 upon cold exposure.** (A) Venn diagram showing  
 389 the overlap between the genes carrying H3K4me3 and the genes induced at any time point during cold  
 390 exposure (left panel). Pie chart showing the percentage of genes gaining or losing H3K4me3 at any time  
 391 point during cold exposure among the 1714 genes which are induced by cold and carry H3K4me3 (right  
 392 panel). (B) Box plot showing the distribution of gene expression during cold exposure for the three gene  
 393 categories listed in (A). Gene expression is shown as  $\log_2$  of the RPKM (Read Per Kilobase per Million  
 394 mapped read). (C) Box plot showing the distribution of  $\log_2$  fold change in gene expression after 3h and 3  
 395 days of cold exposure for the three gene categories listed in (A). (D) Box plot showing the distribution of  
 396 H3K4me3 levels as RPKM for the three gene categories listed in (A). The p-value were computed using a  
 397 two-sided Wilcoxon rank-sum test.

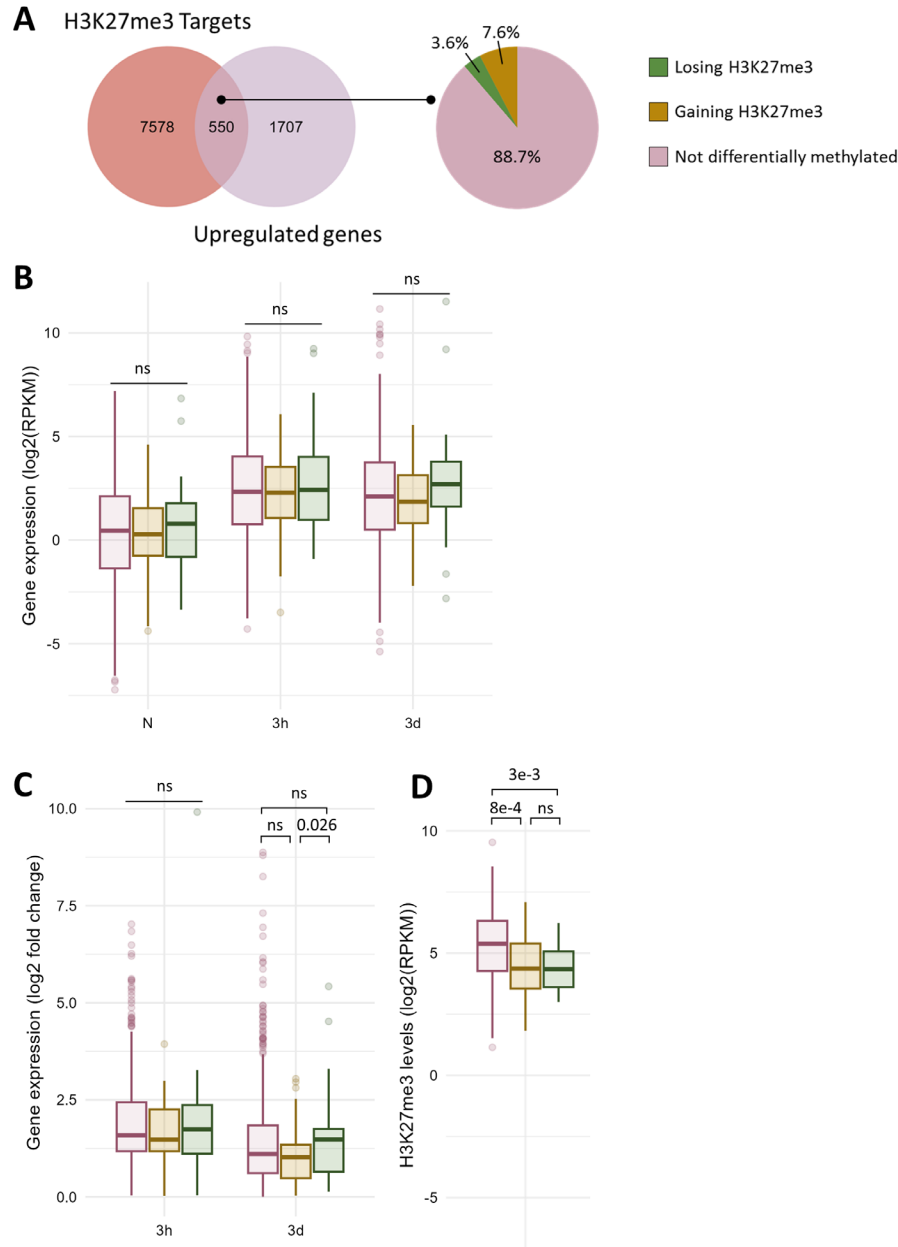

398

399 **Figure 5: Only a fraction of cold induced genes carrying H3K27me3 undergo differential methylation.**

400 (A) Venn diagram showing the overlap between the genes carrying H3K27me3 and the genes induced at  
 401 any time point during cold exposure (left panel). Pie chart showing the percentage of genes gaining or  
 402 losing H3K27me3 at any time point during cold exposure among the 550 genes which are induced by cold  
 403 and carry H3K27me3 (right panel). (B) Box plot showing the distribution of gene expression during cold  
 404 exposure for the three gene categories listed in (A). Gene expression is shown as  $\log_2$  of the RPKM (Read  
 405 Per Kilobase per Million mapped read). (C) Box plot showing the distribution of  $\log_2$  fold change in gene  
 406 expression after 3h and 3 days of cold exposure for the three gene categories listed in (A). (D) Box plot  
 407 showing the distribution of H3K27me3 levels as RPKM for the three gene categories listed in (A). The p-  
 408 value were computed using a two-sided Wilcoxon rank-sum test.

### 409 3.4 REDUCED LEVELS OF H3K27ME3 DO NOT IMPACT THE COLD STRESS 410 RESPONSE



411 While some H3K27me3 targets which are induced by cold showed a reduction in the level of this  
 412 mark during a cold treatment (such as *LTI30* and *COR15A*), others did not show any differential  
 413 methylation (*GOLS3*, *WRKY40*). To examine whether H3K27me3 might hold different roles on  
 414 those two types of genes, their transcriptional activity during a cold treatment was monitored in the  
 415 H3K27 methyltransferase mutant *curly leaf* (*clf*) (Figure 6). In *clf*, H3K27me3 levels were reduced  
 416 by around 50% on those cold-responsive genes, suggesting that, while they are targeted by CLF, a  
 417 second methyltransferase (likely SWN) is also able to deposit H3K27me3 at those loci (Figure 6A).

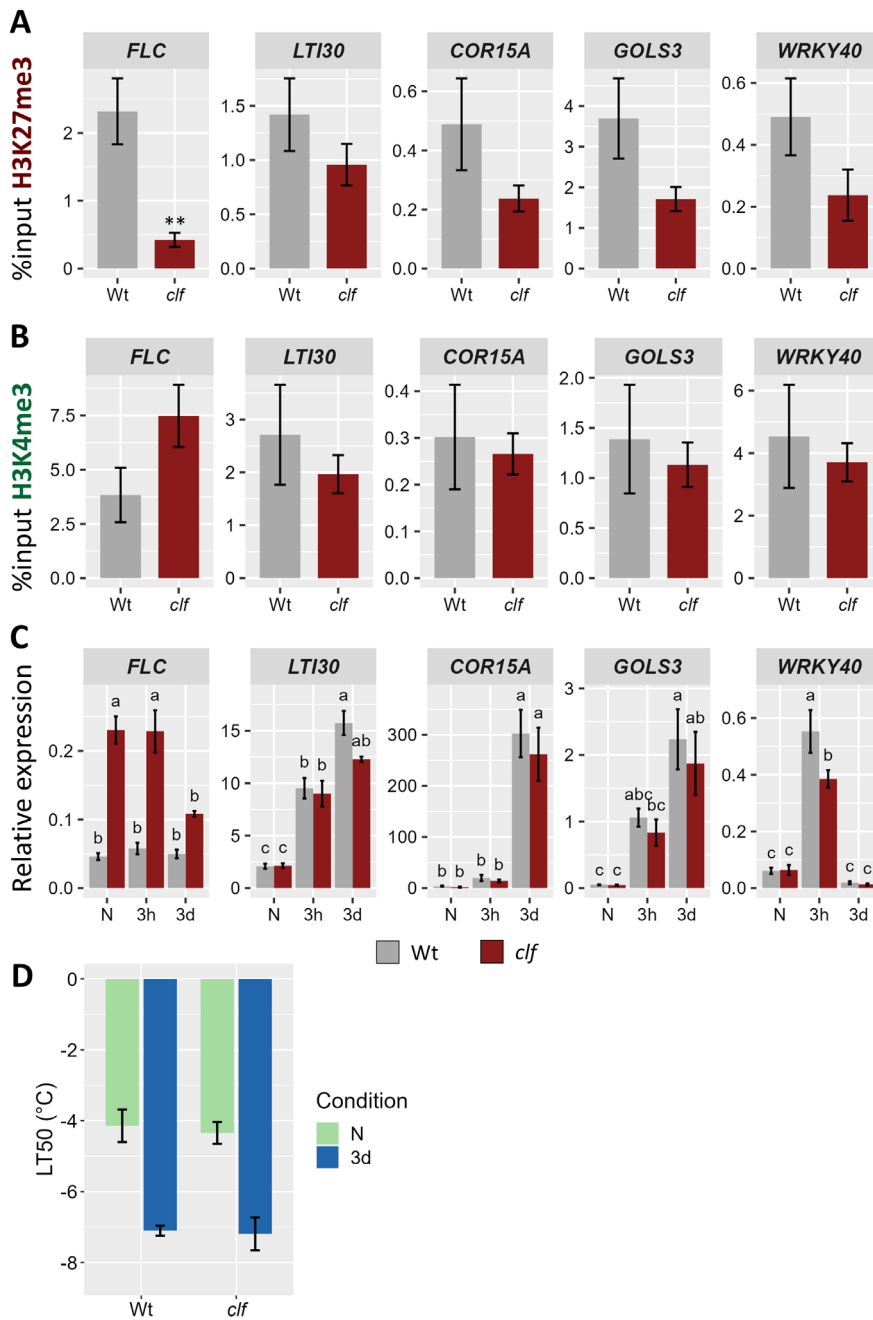

418  
 419 **Figure 6: Reduced levels of H3K27me3 do not impact the transcriptional activity of cold-induced genes.**  
 420 (A) and (B) H3K27me3 (A) and H3K4me3 (B) levels on five H3K27me3-targeted genes in 21 day-old Wt  
 421 and *clf* mutant plants grown at 20°C. After cross-linking, chromatin was extracted and precipitated using

422 *H3K27me3* and *H3K4me3* antibodies, respectively. The purified DNA was amplified by quantitative PCR.  
423 Results are presented as %input. Error bars indicate the sem of four biological replicates. Significance was  
424 tested using *t*-test, \*\* indicates a *p*-value < 0.01. (C) Relative expression level of five *H3K27me3*-targeted  
425 genes in 21 day-old *Wt* and *clf* mutant plants grown at 20°C (*N*) and exposed to 4°C for three hours (3h) or  
426 three days (3d). Transcript levels were measured by RT-qPCR and normalized to three internal controls  
427 (*TIP41*, *ACTIN2* and *PDF*). Error bars indicate the sem of three biological replicates. Significance was  
428 tested by two-way ANOVA followed by a Tukey post-hoc test ( $\alpha = 0.05$ ). Identical letters indicate no  
429 significant difference. All primer sequences used for this experiment can be found in Supplemental Table 1.  
430 (D) Freezing tolerance of *clf* mutant before or after cold acclimation, measured by electrolyte leakage assay.  
431 Plants were grown for 21 days at 20°C (*N*) and then exposed to 4°C for three days (3d). Error bars represent  
432 the sem of three biological replicates. Statistical significance was assessed by 2-way ANOVA followed by a  
433 Dunnett post hoc test, no significant difference was found.

434 Interestingly, the levels of *H3K27me3* in the *clf* mutant in naïve conditions is similar to that  
435 observed after three days of cold exposure in wild-type plants (data not shown). Despite the reduced  
436 *H3K27me3* levels, the expression of those genes was not altered in *clf*, neither in naïve conditions  
437 nor after a cold treatment (Figure 6C). Reduced levels of *H3K27me3* did not impact the basal level  
438 of expression nor the speed or magnitude of induction. On the other hand, *FLC*, whose *H3K27me3*  
439 were significantly reduced in *clf*, displayed a higher expression in this mutant in all the examined  
440 conditions. This increased expression was associated with elevated *H3K4me3* levels in *clf* while  
441 the levels of this mark remained constant on the other genes (Figure 6B). Both the basal and the  
442 acquired freezing tolerance of the *clf* mutant were measured during an electrolyte leakage assay  
443 (Figure 6D). No significant difference to wild-type could be observed, confirming that reduced  
444 *H3K27me3* levels do not impact cold tolerance. Altogether, these data reject the simplistic model  
445 whereby a reduction of *H3K27me3* would directly lead to increased *H3K4me3* levels and to the  
446 transcriptional activation of previously silenced genes.

## 447 **4 DISCUSSION**

### 448 **4.1 CHILLING STRESS ALTERS THE LEVELS OF BOTH H3K4ME3 AND** 449 **H3K27ME3 AT SPECIFIC LOCI**

450 Low temperatures are known to alter the distribution and levels of both *H3K4me3* and *H3K27me3*  
451 in the genome of *Arabidopsis thaliana* (Xi *et al.*, 2020). However, studies have so far either focused  
452 on long cold treatments, with the aim of investigating vernalization, or examined only a handful of  
453 loci (Kwon *et al.*, 2009; Vyse *et al.*, 2020; Xi *et al.*, 2020). The potential contribution of histone  
454 methylation to the response to cold stress therefore remains unelucidated. Here, we attempt to shed  
455 some light on this question by performing a genome-wide investigation of *H3K4me3* and  
456 *H3K27me3* dynamics after short (three hours or three days) 4°C treatments. While *H3K27me3* was  
457 shown to be accumulated in *Arabidopsis* growing in moderate heat (Kim *et al.*, 2023), Western  
458 Blots did not reveal drastic changes in the levels of either mark upon cold exposure (Figure 1A and  
459 B), similarly to what was observed during chilling stress in grapevine leaves (Zhu *et al.*, 2023). In  
460 order to gain a more detailed view on potential changes, ChIP-seq were performed. The  
461 distributions of both *H3K4me3* and *H3K27me3* were not dramatically altered upon cold treatment:  
462 the number of peaks and of genes carrying the marks were sensibly the same in all conditions. This  
463 is in stark contrast to the consequences of cold treatment in *Oryza sativa*, where only 38% of genes  
464 enriched in *H3K27me3* were common to the naïve and cold-stress conditions (Dasgupta *et al.*,  
465 2022). However, it led to many local changes in the levels of both *H3K4me3* and *H3K27me3*, with

466 around 5 300 and 1 100 genes showing an absolute log<sub>2</sub> fold change of at least 0.5, respectively  
467 (Figure 1C to F). Differentially methylated genes were already detected after only three hours of  
468 cold treatment, indicating that this process happens on a time scale similar to that of differential  
469 expression (Calixto *et al.*, 2018). For both marks, differential methylation was skewed towards a  
470 gain of the modification, while after 40 days of cold treatment, Xi *et al.* (2020) observed a trend of  
471 gain for H3K27me<sub>3</sub> and of loss for H3K4me<sub>3</sub>, hinting that varying lengths of cold treatment might  
472 impact the distribution of histone marks differently. Significantly more genes underwent H3K4me<sub>3</sub>  
473 differential methylation than H3K27me<sub>3</sub>, but once reported to the total number of genes targeted  
474 by each mark, the difference was not substantial anymore. However, H3K4me<sub>3</sub> changes were, on  
475 average, of a larger magnitude than those observed for H3K27me<sub>3</sub> (Figure 1C to F, Supplementary  
476 Figure 1).

## 477 **4.2 THE INDUCTION OF COLD STRESS RESPONSIVE GENES DOES NOT RELY ON** 478 **A PcG-TRXG SWITCH**

479 Both H3K4me<sub>3</sub> and H3K27me<sub>3</sub> differential methylation correlated with differential expression,  
480 especially after a longer (three days) cold exposure (Figure 3). Genes induced by cold generally  
481 displayed a gain of H3K4me<sub>3</sub> and/or a loss of H3K27me<sub>3</sub>. However, very little overlap between  
482 H3K4me<sub>3</sub> and H3K27me<sub>3</sub> DM genes was observed, refuting the simplistic model of stress-  
483 responsive genes transitioning from a silenced H3K27me<sub>3</sub> chromatin to an active form enriched in  
484 H3K4me<sub>3</sub> during their transcriptional activation. This was further confirmed by examining the  
485 levels of H3K4me<sub>3</sub> on cold-inducible genes in the *clf* mutant (Figure 6): while their H3K27me<sub>3</sub>  
486 status was reduced, no significant difference in H3K4me<sub>3</sub> could be observed, indicating that  
487 H3K27me<sub>3</sub> is not automatically replaced by H3K4me<sub>3</sub>. Such a PcG/TrxG switch has been  
488 demonstrated for transcriptional activation during development (Engelhorn *et al.*, 2017), but in this  
489 context, the expression of the gene is altered indefinitely. By contrast, stress responses only require  
490 a transient adjustment of the transcriptional activity. It is therefore possible that the chromatin  
491 status of cold responsive genes is not as dramatically altered, to allow for reversion to the initial  
492 state once the stress subsides. Instead of a H3K27me<sub>3</sub>-to-H3K4me<sub>3</sub> switch, H3K4me<sub>3</sub> and  
493 H3K27me<sub>3</sub> differential methylations appear to be mostly independent from one another,  
494 suggesting that they might hold very distinct functions. Indeed, the GO analyses uncovered that  
495 distinct categories of terms were enriched for H3K4me<sub>3</sub> and H3K27me<sub>3</sub> DM genes  
496 (Supplementary Figures 2 and 3). Furthermore, the correlation between differential methylation  
497 and differential expression was stronger for H3K4me<sub>3</sub> than H3K27me<sub>3</sub>. This is consistent with a  
498 previous study from Engelhorn *et al.* (2017) on the floral transition, which reported H3K4me<sub>3</sub> to  
499 be a stronger predictor of transcriptional changes than H3K27me<sub>3</sub>. The levels of the active mark  
500 were also altered prior to the ones of its silencing counterpart during seasonal oscillations (Nishio  
501 *et al.*, 2020). In the present study, while both marks already displayed variations after only three  
502 hours of cold exposure, only about 11% of H3K4me<sub>3</sub> changes were detected both after three hours  
503 and three days of cold treatment, suggesting that they are mostly transient (Figure 2D). On the  
504 contrary, the majority of H3K27me<sub>3</sub> changes were shared by both time points, indicating a higher  
505 stability of H3K27me<sub>3</sub> modifications. This is consistent with previous analyses of H3K4me<sub>3</sub> and  
506 H3K27me<sub>3</sub> dynamics in HeLa cells, which reported H3K4me<sub>3</sub> as having a faster turn-over and re-  
507 establishment speed than H3K27me<sub>3</sub> (Zheng *et al.*, 2014; Alabert *et al.*, 2015; Reverón-Gómez *et*  
508 *al.*, 2018). Mathematical modelling demonstrated that chromatin marks with slower dynamics are  
509 more robust against rapidly fluctuating environmental conditions, as the signal has to persist longer  
510 for a new equilibrium for the level of the mark to be reached (Berry, Dean and Howard, 2017). The  
511 different dynamics of H3K4me<sub>3</sub> and H3K27me<sub>3</sub> could therefore confer them different

512 responsiveness to environmental variations, with H3K4me3 contributing to the immediate stress  
513 response to lower temperature (as suggested by the enrichment of abiotic and biotic stress-response  
514 related GO terms) and H3K27me3 mediating more long term responses such as developmental  
515 adaptations (Supplementary Figures 2 and 3).

### 516 **4.3 ROLE OF DIFFERENTIAL METHYLATION IN GENE REGULATION**

517 It has been reported that cold-inducible H3K27me3 targets lose the repressive mark upon induction  
518 (Kwon *et al.*, 2009), but in a previous work, we demonstrated that loss of H3K27me3 is not required  
519 for induction (Vyse *et al.*, 2020). This new genome wide analysis confirms our prior report and  
520 refutes the idea that H3K27me3 is an absolute obstacle for transcriptional activation of cold-  
521 responsive genes. To further dissect the potential role of cold-induced H3K27me3 loss on those  
522 genes, we used the *clf* mutant, in which many cold-responsive genes present a reduced H3K27me3  
523 status. The reduced H3K27me3 levels in the *clf* mutant did not lead to a change in the basal  
524 expression of the genes investigated here (Figure 6C), suggesting that additional factors are  
525 required for their transcriptional activation, likely transcription factors such as the CBFs. Similar  
526 observations were made by Liu *et al.* (2014), where the absence of a functional CLF and therefore  
527 the reduction of H3K27me3 at drought inducible genes did not trigger their induction in naïve  
528 conditions. However, the authors observed a higher magnitude of induction upon stress exposure,  
529 which was not detected in the present study. It is therefore likely that H3K27me3 holds a different  
530 function in the response to drought and in the response to cold. Instead, the silencing mark might  
531 control the induction speed of the genes: reduced H3K27me3 status has been reported as allowing  
532 a faster transcriptional activation in the case of camalexin biosynthesis genes during pathogen  
533 infection (Zhao *et al.*, 2021). This does not seem to hold true for cold-inducible genes: the  
534 expression levels in Wt and *clf* were comparable both after three hours and three days of cold  
535 exposure, suggesting that lower H3K27me3 status does not lead to a faster induction. However,  
536 more detailed time-course transcriptomic experiments would be required in order to reach a definite  
537 conclusion. Interestingly, the levels of H3K27me3 on cold inducible genes in the *clf* mutants are  
538 similar to those observed after three days of cold exposure. The lack of higher or faster induction  
539 of those genes upon cold stress in *clf* is therefore consistent with observations from Kwon *et al.*  
540 (2009), where a persisting cold-induced lower H3K27me3 status did not lead to an altered  
541 expression of the genes upon cold re-exposure. Furthermore, H3K27me3 does not appear to  
542 directly contribute to the regulation of the cold stress response (at least for the tested conditions),  
543 as *clf* mutants also did not show an altered basal or acquired freezing tolerance compared to wild-  
544 type (Fig 6D). Instead, H3K27me3 might contribute to the regulation of deacclimation or memory  
545 processes, only affecting transcriptional activity after the cold episode subsides. In addition, many  
546 development-related terms were identified in the gene sets gaining H3K27me3, suggesting that  
547 they might be down-regulated upon cold exposure. However, when performing a GO term analysis  
548 on the lists of genes differentially expressed after three hours and three days of cold exposure, no  
549 such enrichment for development-related genes could be detected (Supplementary Figure 4B and  
550 D). This suggests that the changes in the methylation level of these genes might serve another  
551 purpose than an immediate adjustment of their transcriptional activity. Alternatively, the role of  
552 CLF in the cold stress response may be masked by its paralogue SWN, as both proteins have  
553 overlapping functions, at least for developmental processes (Chanvivattana *et al.*, 2004).

554 Similarly, while many cold-inducible genes underwent a gain of H3K4me3 upon cold exposure,  
555 this could not be generalized to all up-regulated genes. This was also observed for other abiotic  
556 stresses (Sani *et al.*, 2013; Yamaguchi *et al.*, 2021). The correlation analyses between differential



557 methylation and expression suggest that both phenomena have different dynamics, with expression  
558 changes occurring prior to methylation status alterations. This would indicate that H3K4me3 gain  
559 is not necessary for the initiation of the transcriptional activation but it might positively feed back  
560 into it, as genes gaining H3K4me3 displayed a higher magnitude of induction than non DM genes  
561 (Figure 4C). While H3K4me3 has long been described as being necessary for transcription  
562 initiation, this idea has recently been refuted (Shilatifard, 2012; Lauberth *et al.*, 2013; Wang *et al.*,  
563 2023). Instead, H3K4me3 was demonstrated to prevent RNA polymerase II pausing, thereby  
564 accelerating elongation. This suggests that higher H3K4me3 levels would lead to higher  
565 accumulation of transcripts, as observed in this study for genes gaining H3K4me3 upon cold  
566 exposure (Figure 4B).

567 Despite the observed correlations between differential methylation and differential expression, it  
568 is important to note that numerous cold-regulated genes did not undergo differential methylation  
569 and vice-versa (Supplementary Figure 5), indicating that differential methylation is neither required  
570 for differential expression nor it's a direct consequence. However, differential methylation might  
571 allow for a larger magnitude of induction of cold-responsive genes, as both H3K4me3-gaining and  
572 H3K27me3-losing genes displayed slightly higher fold-change of gene expression than non-  
573 differentially methylated genes (Figures 4 and 5). Alternatively, the limited overlap between  
574 differential methylation and expression might be explained by the fact that all the epigenomic and  
575 transcriptomic experiments of the current study have been performed on whole seedlings. This  
576 prevents us from testing whether different tissues or cell types respond differently to lower  
577 temperatures. In tomatoes for example, nitrogen treatment triggered H3K4me3 and H3K27me3  
578 differential methylation on distinct sets of genes in shoots and roots (Julian, Patrick and Li, 2023).  
579 Performing similar investigations in a tissue-specific approach might allow us to decipher more  
580 precisely the relationship between histone methylation and transcriptional activity.

581 Uncovering the exact potential role of differential histone methylation in the response to cold will  
582 require the identification of the mechanisms controlling it. For both H3K4me3 and H3K27me3,  
583 differential methylation was not associated with altered nucleosome density (data not shown),  
584 suggesting that differential methylation is due to active mechanisms rather than H3 depletion or  
585 accumulation. H3K4me3 is deposited by methyltransferases, which are known to act redundantly  
586 in *Arabidopsis thaliana* (Chen *et al.*, 2017; Cheng *et al.*, 2020). According to the transcriptomic  
587 data generated in this study and previously generated data, both *ATX1* and *ATX4* are induced by  
588 exposure to low temperatures (Supplementary Figure 6A, Vyse *et al.* 2020), suggesting them as  
589 first candidates. In particular, *ATX1* has already been shown to deposit H3K4me3 on specific genes  
590 upon cold treatment (Miura, Renhu and Suzuki, 2020). H3K27me3 loss upon heat has been  
591 demonstrated to be redundantly controlled by JMJ30, JMJ32, ELF6 and REF6 (Yamaguchi *et al.*,  
592 2021), the same methyltransferases might therefore regulate H3K27me3 levels during cold stress.  
593 In particular, both ELF6, JMJ13 and JMJ30 were found to be induced during cold exposure  
594 (Supplementary Figure 6B, Vyse *et al.* 2020). It would therefore be of high interest to examine the  
595 cold tolerance abilities and transcriptional response of such mutants to cold exposure.

596 In conclusion, this study provides a genome wide perspective on cold-triggered histone methylation  
597 dynamics and demonstrates that H3K4me3 and H3K27me3 differential methylations are  
598 independent from one another. H3K4me3 correlates more strongly with differential expression and  
599 appears to regulate immediate stress responses, while H3K27me3 might contribute to longer term  
600 responses such as developmental adaptation. As reduced H3K27me3 levels did not impact the  
601 transcriptional activity of cold-responsive genes, further work is required to finally elucidate the



602 role played by this repressive mark at those genes. It would especially interesting to examine  
603 whether it might contribute to deacclimation processes.

## 604 **5 CONFLICT OF INTEREST**

605 The authors declare that the research was conducted in the absence of any commercial or financial  
606 relationships that could be construed as a potential conflict of interest.

## 607 **6 AUTHOR CONTRIBUTIONS**

608 LF and DS conceived the project. LF performed most of the experiments, analyzed and interpreted  
609 the data. NFK performed the western blots experiments. ABK performed the electrolyte leakage  
610 experiments. XX helped to prepare the ChIP-seq libraries. KK contributed to the ChIP-seq design  
611 and analysis. LF and DS drafted the manuscript, which was then revised by all authors.

## 612 **7 FUNDING**

613 This work was supported by the Deutsche Forschungsgemeinschaft- funded Collaborative  
614 Research Center CRC973, project C7.

## 615 **8 ACKNOWLEDGMENTS**

616 The authors would like to thank Jose M. Muino for his precious expertise in ChIP-seq analysis and  
617 the HPC Service of ZEDAT, Freie Universität Berlin, for computing time.

## 618 **9 REFERENCES**

619 Alabert, C. *et al.* (2015) ‘Two distinct modes for propagation of histone PTMs across the cell  
620 cycle’, *Genes and Development*, 29(6), pp. 585–590. doi: 10.1101/gad.256354.114.

621 Alexa, A. and Rahnenfuhrer, J. (2021) ‘topGO: Enrichment Analysis for Gene Ontology’.

622 Alexandre, C. *et al.* (2009) ‘Arabidopsis MSII Is Required for Negative Regulation of the  
623 Response to Drought Stress’, *Molecular Plant*, 2(4), pp. 675–687. doi: 10.1093/mp/ssp012.

624 Bennet, L., Melchers, B. and Proppe, B. (2020) *Curta: A General-purpose High-Performance*  
625 *Computer at ZEDAT, Freie Universität Berlin*. doi: 10.17169/refubium-26754.

626 Berry, S., Dean, C. and Howard, M. (2017) ‘Slow Chromatin Dynamics Allow Polycomb Target  
627 Genes to Filter Fluctuations in Transcription Factor Activity’, *Cell Systems*, 4(4), pp. 445–457.e8.  
628 doi: 10.1016/j.cels.2017.02.013.

629 Blakey, C. A. and Litt, M. D. (2015) ‘Histone modifications-models and mechanisms’, *Epigenetic*  
630 *Gene Expression and Regulation*, pp. 21–42. doi: 10.1016/B978-0-12-799958-6.00002-0.

631 Bowler, C. *et al.* (2004) ‘Chromatin techniques for plant cells’, *Plant Journal*, 39(5), pp. 776–789.  
632 doi: 10.1111/j.1365-313X.2004.02169.x.

- 633 Calixto, C. P. G. *et al.* (2018) ‘Rapid and dynamic alternative splicing impacts the Arabidopsis  
634 cold response transcriptome’, *The Plant Cell*, 30(July), p. tpc.00177.2018. doi:  
635 10.1105/tpc.18.00177.
- 636 Carlson, M. (2019) ‘org.At.tair.db: Genome wide annotation for Arabidopsis.’
- 637 Chanvivattana, Y. *et al.* (2004) ‘Interaction of Polycomb-group proteins controlling flowering in  
638 Arabidopsis’, *Development*, 131(21), pp. 5263–5276. doi: 10.1242/dev.01400.
- 639 Chen, L. Q. *et al.* (2017) ‘ATX3, ATX4, and ATX5 encode putative H3K4 methyltransferases and  
640 are critical for plant development’, *Plant Physiology*, 174(3), pp. 1795–1806. doi:  
641 10.1104/pp.16.01944.
- 642 Cheng, K. *et al.* (2020) ‘Histone tales: lysine methylation, a protagonist in Arabidopsis  
643 development’, 71(3), pp. 793–807. doi: 10.1093/jxb/erz435.
- 644 Dasgupta, P. *et al.* (2022) ‘Dynamicity of histone H3K27ac and H3K27me3 modifications regulate  
645 the cold-responsive gene expression in *Oryza sativa* L. ssp. indica’, *Genomics*, 114(4), p. 110433.  
646 doi: 10.1016/j.ygeno.2022.110433.
- 647 Ding, Y., Avramova, Z. and Fromm, M. (2011) ‘The Arabidopsis trithorax-like factor ATX1  
648 functions in dehydration stress responses via ABA-dependent and ABA-independent pathways’,  
649 *Plant Journal*, 66(5), pp. 735–744. doi: 10.1111/j.1365-313X.2011.04534.x.
- 650 Dobin, A. *et al.* (2013) ‘STAR: Ultrafast universal RNA-seq aligner’, *Bioinformatics*, 29(1), pp.  
651 15–21. doi: 10.1093/bioinformatics/bts635.
- 652 Engelhorn, J. *et al.* (2017) ‘Dynamics of H3K4me3 Chromatin Marks Prevails over H3K27me3  
653 for Gene Regulation during Flower Morphogenesis in Arabidopsis thaliana’, *Epigenomes*, 1(3), p.  
654 8. doi: 10.3390/epigenomes1020008.
- 655 Faivre, L. and Schubert, D. (2023) ‘Facilitating transcriptional transitions: an overview of  
656 chromatin bivalency in plants’, *Journal of Experimental Botany*, 74(6), pp. 1770–1783. doi:  
657 10.1093/jxb/erad029.
- 658 Friedrich, T. *et al.* (2018) ‘Chromatin-based mechanisms of temperature memory in plants’,  
659 (March), pp. 1–9. doi: 10.1111/pce.13373.
- 660 Gaspar, J. M. (2018) ‘Improved peak-calling with MACS2’, *bioRxiv*, pp. 1–16. doi:  
661 10.1101/496521.
- 662 Gilmour, S. J., Hajela, R. K. and Thomashow, M. F. (1988) ‘Cold Acclimation in Arabidopsis  
663 thaliana’, *Plant Physiology*, 87(3), pp. 745–750. doi: 10.1104/pp.87.3.745.
- 664 Hinch, D. K. and Zuther, E. (2014) *Plant Cold Acclimation: Methods and Protocols*. Edited by  
665 Springer New York 2014. doi: 10.1007/978-1-4939-2687-9.
- 666 Hisanaga, T. *et al.* (2023) ‘The Polycomb repressive complex 2 deposits H3K27me3 and represses  
667 transposable elements in a broad range of eukaryotes’, *Current Biology*, pp. 1–14. doi:

- 668 10.1016/j.cub.2023.08.073.
- 669 Ingham, P. W. (1983) ‘Differential expression of bithorax complex genes in the absence of the  
670 extra sex combs and trithorax genes’, *Nature*, 306(5943), pp. 591–593. doi: 10.1038/306591a0.
- 671 Jan, N., Andrabi, K. I. and others (2009) ‘Cold resistance in plants: A mystery unresolved’,  
672 *Electronic Journal of Biotechnology*, 12(3), pp. 14–15.
- 673 Julian, R., Patrick, R. M. and Li, Y. (2023) ‘Organ-specific characteristics govern the relationship  
674 between histone code dynamics and transcriptional reprogramming during nitrogen response in  
675 tomato’, *Communications biology*, 6(1), p. 1225. doi: 10.1038/s42003-023-05601-8.
- 676 Kim, J. *et al.* (2023) ‘Warm temperature-triggered developmental reprogramming requires VIL1-  
677 mediated, genome-wide H3K27me3 accumulation in Arabidopsis’, *Development*, 150(5). doi:  
678 10.1242/dev.201343.
- 679 Kim, S. Y., Zhu, T. and Renee Sung, Z. (2010) ‘Epigenetic regulation of gene programs by EMF1  
680 and EMF2 in Arabidopsis’, *Plant Physiology*, 152(2), pp. 516–528. doi: 10.1104/pp.109.143495.
- 681 Kleinmanns, J. A. *et al.* (2017) ‘BLISTER regulates polycomb-target genes, represses stress-  
682 regulated genes and promotes stress responses in Arabidopsis thaliana’, *Frontiers in Plant Science*,  
683 8, p. 1530. doi: 10.3389/fpls.2017.01530.
- 684 Kleinmanns, J. A. and Schubert, D. (2014) ‘Polycomb and Trithorax group protein-mediated  
685 control of stress responses in plants’, *Biological Chemistry*, 395(11), pp. 1291–1300. doi:  
686 10.1515/hsz-2014-0197.
- 687 Köhler, C. and Hennig, L. (2010) ‘Regulation of cell identity by plant Polycomb and trithorax  
688 group proteins’, *Current Opinion in Genetics and Development*, 20(5), pp. 541–547. doi:  
689 10.1016/j.gde.2010.04.015.
- 690 Kornberg, R. D. (1977) ‘Structure of chromatin.’, *Annual review of biochemistry*, 46, pp. 931–954.  
691 doi: 10.1146/annurev.bi.46.070177.004435.
- 692 Kuroda, M. I. *et al.* (2020) ‘Dynamic Competition of Polycomb and Trithorax in Transcriptional  
693 Programming’, *Annual Review of Biochemistry*, 89, pp. 235–253. doi: 10.1146/annurev-biochem-  
694 120219-103641.
- 695 Kwon, C. S. *et al.* (2009) ‘Histone occupancy-dependent and -independent removal of H3K27  
696 trimethylation at cold-responsive genes in Arabidopsis’, *Plant Journal*, 60(1), pp. 112–121. doi:  
697 10.1111/j.1365-313X.2009.03938.x.
- 698 Langmead, B. and Salzberg, S. L. (2012) ‘Fast gapped-read alignment with Bowtie 2’, *Nature*  
699 *Methods*, 9(4), pp. 357–359. doi: 10.1038/nmeth.1923.
- 700 Lauberth, S. M. *et al.* (2013) ‘H3K4me3 interactions with TAF3 regulate preinitiation complex  
701 assembly and selective gene activation’, *Cell*, 152(5), pp. 1021–1036. doi:  
702 10.1016/j.cell.2013.01.052.

- 703 Li, H. *et al.* (2009) ‘The Sequence Alignment/Map format and SAMtools’, *Bioinformatics*, 25(16),  
704 pp. 2078–2079. doi: 10.1093/bioinformatics/btp352.
- 705 Liao, Y., Smyth, G. K. and Shi, W. (2014) ‘FeatureCounts: An efficient general purpose program  
706 for assigning sequence reads to genomic features’, *Bioinformatics*, 30(7), pp. 923–930. doi:  
707 10.1093/bioinformatics/btt656.
- 708 Liu, N., Fromm, M. and Avramova, Z. (2014) ‘H3K27me3 and H3K4me3 chromatin environment  
709 at super-induced dehydration stress memory genes of arabidopsis thaliana’, *Molecular Plant*, 7(3),  
710 pp. 502–513. doi: 10.1093/mp/ssu001.
- 711 Love, M. I., Huber, W. and Anders, S. (2014) ‘Moderated estimation of fold change and dispersion  
712 for RNA-seq data with DESeq2’, *Genome Biology*, 15(12), pp. 1–21. doi: 10.1186/s13059-014-  
713 0550-8.
- 714 Luger, K. *et al.* (1997) ‘Crystal structure of the nucleosome core particle at 2.8 Å resolution’,  
715 *Nature*, 389(6648), pp. 251–260. doi: 10.1038/38444.
- 716 Luger, K. and Richmond, T. J. (1998) ‘The histone tails of the nucleosome’, *Current Opinion in*  
717 *Genetics and Development*, 8(2), pp. 140–146. doi: 10.1016/S0959-437X(98)80134-2.
- 718 Medina, J. *et al.* (1999) ‘The Arabidopsis CBF gene family is composed of three genes encoding  
719 AP2 domain-containing proteins whose expression is regulated by low temperature but not by  
720 abscisic acid or dehydration’, *Plant Physiology*, 119(2), pp. 463–469. doi: 10.1104/pp.119.2.463.
- 721 de Mendiburu, F. and Yaseen, M. (2020) ‘agricolae: Statistical Procedures for Agricultural  
722 Research’.
- 723 Miura, K., Renhu, N. and Suzaki, T. (2020) ‘The PHD finger of Arabidopsis SIZ1 recognizes  
724 trimethylated histone H3K4 mediating SIZ1 function and abiotic stress response’, *Communications*  
725 *Biology*, 3(1), pp. 1–10. doi: 10.1038/s42003-019-0746-2.
- 726 Müller, J. *et al.* (2002) ‘Histone methyltransferase activity of a Drosophila Polycomb group  
727 repressor complex’, *Cell*, 111(2), pp. 197–208. doi: 10.1016/S0092-8674(02)00976-5.
- 728 Nishio, H. *et al.* (2020) ‘Seasonal plasticity and diel stability of H3K27me3 in natural fluctuating  
729 environments’, *Nature Plants*, 6(9), pp. 1091–1097. doi: 10.1038/s41477-020-00757-1.
- 730 Ramírez, F. *et al.* (2016) ‘deepTools2: a next generation web server for deep-sequencing data  
731 analysis’, *Nucleic acids research*, 44(W1), pp. W160–W165. doi: 10.1093/nar/gkw257.
- 732 Reverón-Gómez, N. *et al.* (2018) ‘Accurate Recycling of Parental Histones Reproduces the Histone  
733 Modification Landscape during DNA Replication’, *Molecular Cell*, 72(2), pp. 239–249.e5. doi:  
734 10.1016/j.molcel.2018.08.010.
- 735 Ringrose, L. and Paro, R. (2004) ‘Epigenetic regulation of cellular memory by the polycomb and  
736 trithorax group proteins’, *Annual Review of Genetics*, 38, pp. 413–443. doi:  
737 10.1146/annurev.genet.38.072902.091907.

- 738 Robinson, J. T. *et al.* (2011) ‘Integrative genomics viewer’, *Nature Biotechnology*, 29(1), pp. 24–  
739 26. doi: 10.1038/nbt.1754.
- 740 Roudier, F. *et al.* (2011) ‘Integrative epigenomic mapping defines four main chromatin states in  
741 Arabidopsis’, *EMBO Journal*, 30(10), pp. 1928–1938. doi: 10.1038/emboj.2011.103.
- 742 Sani, E. *et al.* (2013) ‘Hyperosmotic priming of Arabidopsis seedlings establishes a long-term  
743 somatic memory accompanied by specific changes of the epigenome’, *Genome Biology*, 14(6), pp.  
744 1–24. doi: 10.1186/gb-2013-14-6-r59.
- 745 Shi, Y., Ding, Y. and Yang, S. (2018) ‘Molecular Regulation of CBF Signaling in Cold  
746 Acclimation’, *Trends in Plant Science*, 23(7), pp. 623–637. doi: 10.1016/j.tplants.2018.04.002.
- 747 Shilatifard, A. (2012) ‘The COMPASS family of histone H3K4 methylases: Mechanisms of  
748 regulation in development and disease pathogenesis’, *Annual Review of Biochemistry*, 81, pp. 65–  
749 95. doi: 10.1146/annurev-biochem-051710-134100.
- 750 Song, Z. T. *et al.* (2021) ‘Histone H3K4 methyltransferases SDG25 and ATX1 maintain heat-stress  
751 gene expression during recovery in Arabidopsis’, *Plant Journal*, 105(5), pp. 1326–1338. doi:  
752 10.1111/tpj.15114.
- 753 Vyse, K. *et al.* (2020) ‘Transcriptional and Post-Transcriptional Regulation and Transcriptional  
754 Memory of Chromatin Regulators in Response to Low Temperature’, *Frontiers in Plant Science*,  
755 11(February), pp. 1–18. doi: 10.3389/fpls.2020.00039.
- 756 Wang, D. Z. *et al.* (2017) ‘Gene regulation and signal transduction in the ICE–CBF–COR signaling  
757 pathway during cold stress in plants’, *Biochemistry (Moscow)*, 82(10), pp. 1103–1117. doi:  
758 10.1134/S0006297917100030.
- 759 Wang, H. *et al.* (2023) ‘H3K4me3 regulates RNA polymerase II promoter-proximal pause-release’,  
760 *Nature*, 615(7951), pp. 339–348. doi: 10.1038/s41586-023-05780-8.
- 761 Xi, Y. *et al.* (2020) ‘Transcriptome and epigenome analyses of vernalization in Arabidopsis  
762 thaliana’, *Plant Journal*, 103(4), pp. 1490–1502. doi: 10.1111/tpj.14817.
- 763 Yamaguchi-Shinozaki, K. and Shinozaki, K. (1994) ‘A Novel cis-Acting Element in an  
764 Arabidopsis Gene is Involved in Responsiveness to Drought, Low-Temperature, or High-Salt  
765 Stress’, *Plant Cell*, 6(2), pp. 251–264. doi: 10.2307/3869643.
- 766 Yamaguchi, N. *et al.* (2021) ‘H3K27me3 demethylases alter HSP22 and HSP17.6C expression in  
767 response to recurring heat in Arabidopsis’, *Nature Communications*, 12(1), pp. 1–16. doi:  
768 10.1038/s41467-021-23766-w.
- 769 Zarka, D. G. *et al.* (2003) ‘Cold Induction of Arabidopsis CBF Genes Involves Multiple ICE  
770 (Inducer of CBF Expression) Promoter Elements and a Cold-Regulatory Circuit That Is  
771 Desensitized by Low Temperature’, *Plant Physiology*, 133(2), pp. 910–918. doi:  
772 10.1104/pp.103.027169.
- 773 Zhang, X. *et al.* (2007) ‘Whole-genome analysis of histone H3 lysine 27 trimethylation in



- 774 Arabidopsis', *PLoS Biology*, 5(5), pp. 1026–1035. doi: 10.1371/journal.pbio.0050129.
- 775 Zhao, K. *et al.* (2021) 'A novel form of bivalent chromatin associates with rapid induction of  
776 camalexin biosynthesis genes in response to a pathogen signal in Arabidopsis', *eLife*, 10, pp. 1–15.  
777 doi: 10.7554/eLife.69508.
- 778 Zhao, Y. and Garcia, B. A. (2015) 'Comprehensive catalog of currently documented histone  
779 modifications', *Cold Spring Harbor Perspectives in Biology*, 7(9). doi:  
780 10.1101/cshperspect.a025064.
- 781 Zheng, Y. *et al.* (2014) 'Site-specific human histone H3 methylation stability: fast K4me3  
782 turnover', *Proteomics*, 23, pp. 1–7. doi: 10.1002/pmic.201400060.Site-specific.
- 783 Zhu, Z. *et al.* (2023) 'Genome-wide profiling of histone H3 lysine 27 trimethylation and its  
784 modification in response to chilling stress in grapevine leaves', *Horticultural Plant Journal*, 9(3),  
785 pp. 496–508. doi: 10.1016/j.hpj.2023.03.002.
- 786 Zuther, E. *et al.* (2019) 'Molecular signatures associated with increased freezing tolerance due to  
787 low temperature memory in Arabidopsis', *Plant Cell and Environment*, 42(3), pp. 854–873. doi:  
788 10.1111/pce.13502.

## 789 **11 DATA AVAILABILITY STATEMENT**

790 The datasets generated for this study has been deposited in NCBI's Gene Expression Omnibus and  
791 are accessible through GEO Series accession number GSE255445  
792 (<https://www.ncbi.nlm.nih.gov/geo/query/acc.cgi?&acc=GSE255445>)

793
